# Supplementary material for: Development of a Nonenzymatic Electrochemical Sensor for Organophosphate Pesticide Detection Using Copper (II) Oxide Nanorod Electrodes
Source: Hindawi journal article supplement (doi:10.1155/2021/6623668), 2021-07-28
Supplement: f1 [file 6623668.f1.pdf]

# **Development of Non-enzymatic Electrochemical Sensor for Organophosphate Pesticide Detection using Copper (II) Oxide Nanorod Electrodes**

*Phichamon Sakdarat,<sup>1</sup> Jidapa Chongsuebsiri,<sup>1</sup> Chanchana Thanachayanont,<sup>2</sup> Seeroong Prichanont,<sup>3</sup> and Porpin Pungetmongkol<sup>1\*</sup>*

<sup>1</sup> International School of Engineering (ISE), Faculty of Engineering, Chulalongkorn University, Bangkok 10330, Thailand.

<sup>2</sup> National Metal and Materials Technology Center (MTEC), National Science and Technology Development Agency, Pathumthani 12120, Thailand.

<sup>3</sup> Department of Chemical Engineering, Faculty of Engineering, Chulalongkorn University, Bangkok 10330, Thailand.

\*Correspondence should be addressed to Porpin Pungetmongkol; [porpin.p@chula.ac.th](mailto:porpin.p@chula.ac.th)

## Supplementary Materials

Figure S1

UV-vis spectroscopy of complex product between electrodes and a) Chlorpyrifos and Pirimiphos, b) Parathion and Paraoxon.

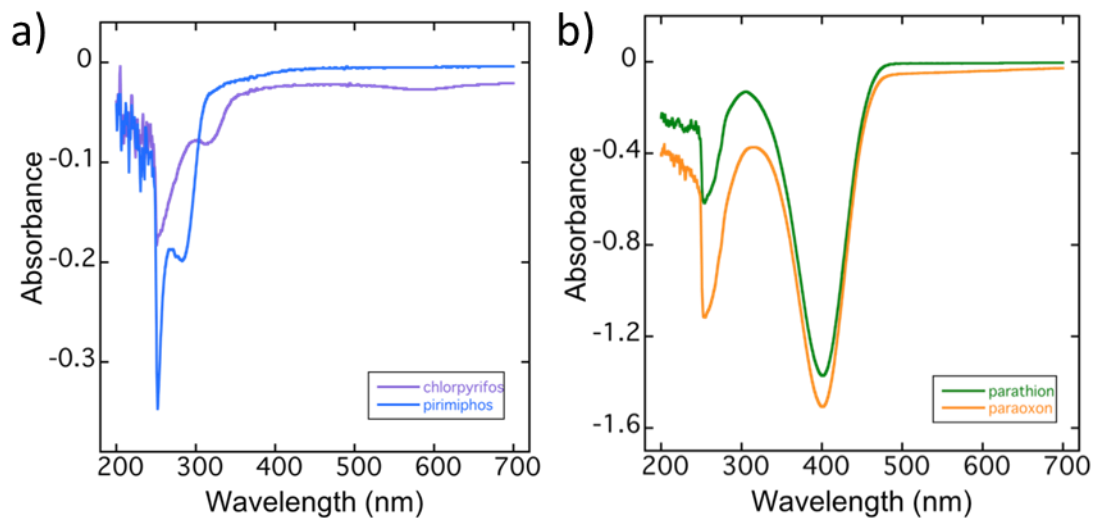

Table S1.

Comparison of various electrochemical sensor study for detection of organophosphate pesticides.

| Types of pesticide             | Sensing material integrating with structural support                                                                                        | Methods            | Detection Limit/<br>Detection ranges | Ref.            |
|--------------------------------|---------------------------------------------------------------------------------------------------------------------------------------------|--------------------|--------------------------------------|-----------------|
| Chlorpyrifos                   | AChE immobilized on an oxidized exfoliated graphite nanoplatelet (xGnPs)-chitosan cross-linked composite                                    | Electrochemical    | 0.005 - 0.039 mM<br>0.064 - 0.258 mM | 19 <sup>†</sup> |
| Methyl parathion               | Recombinant E. coli immobilized on SPCE                                                                                                     | Cyclic voltammetry | 2-80 $\mu$ M                         | 22 <sup>†</sup> |
| Paraoxon                       | Esterase 2 from Alicyclobacillus acidocaldarius immobilization on a nitrocellulose membrane                                                 | Electrochemical    | $2.75 \times 10^{-3}$ ppm            | 20 <sup>†</sup> |
| Chlorpyriphos-oxon             | poly(3,4-ethylenedioxythiophene) (PEDOT) incorporated in AChE- based screen printed biosensor                                               | Electrochemical    | $1 \times 10^{-10}$ M                | 23 <sup>†</sup> |
| Organophosphate                | AChE on graphene/polyaniline (G/PANI) composite film                                                                                        | Electrochemical    | 20 ng/mL                             | 24 <sup>†</sup> |
| Organophosphate                | Pd wormlike nanochains/graphitic carbon nitride (Pd WLNCs/g-C <sub>3</sub> N <sub>4</sub> ) nanocomposites and acetylcholinesterase (AChE). | Electrochemical    | 1.00nM-14.96 $\mu$ M                 | 25 <sup>†</sup> |
| Methyl parathion/<br>Parathion | ELP-OPH/BSA/TiO <sub>2</sub> NFs/c-MWCNTs                                                                                                   | Amperometric       | 10nM/12nM                            | 27 <sup>†</sup> |
| Carbaryl                       | AChE/Ag NPs-CGR-NF/GCE                                                                                                                      | Cyclic voltammetry | 54.5 $\mu$ M                         | 33 <sup>†</sup> |
| Chlorpyrifos                   | AChE/Ag NPs-CGR-NF/GCE                                                                                                                      | Cyclic voltammetry | 53 $\mu$ M                           | 33 <sup>†</sup> |
| Paraoxon                       | TGO-UiO-66/GCE                                                                                                                              | Electrochemical    | 0.2 nM                               | 28 <sup>†</sup> |
| Chlorpyrifos                   | TGO-UiO-66/GCE                                                                                                                              | Electrochemical    | 1.0 nM                               | 28 <sup>†</sup> |
| Parathion                      | Nano nickel oxide on SPCE                                                                                                                   | Electrochemical    | 24 nM                                | 29 <sup>†</sup> |
| Pirimiphos                     | CuO NRs                                                                                                                                     | Cyclic voltammetry | 0.294 $\mu$ M                        | This work       |
| Paraoxon                       | CuO NRs                                                                                                                                     | Cyclic voltammetry | 0.557 $\mu$ M                        | This work       |
| Parathion                      | CuO NRs                                                                                                                                     | Cyclic voltammetry | 0.612 $\mu$ M                        | This work       |
| Chlorpyrifos                   | CuO NRs                                                                                                                                     | Cyclic voltammetry | 0.571 $\mu$ M                        | This work       |

<sup>†</sup>Reference numbers refer to the bibliography of main text.
